# Supplementary material
Source: PubMed Central journal article supplement (PMC7960451)
Supplement: 15-00872.pdf [file 15-00872.pdf]

**On-line Table: Disposition of included patients<sup>a</sup>**

|                                                   | Malignant EEG (n = 0) | Malignant EEG (n = 9) | Nonmalignant EEG (n = 12) | Nonmalignant EEG (n = 12) |
|---------------------------------------------------|-----------------------|-----------------------|---------------------------|---------------------------|
| Outcome                                           | Good                  | Bad                   | Good                      | Bad                       |
| Disposition                                       |                       |                       |                           |                           |
| Home/outpatient rehab                             | NA                    | 0                     | 3                         | 0                         |
| Inpatient rehab                                   | NA                    | 0                     | 9                         | 0                         |
| Nursing home/PVS                                  | NA                    | 1                     | 0                         | 4                         |
| Death (poor neurologic prognosis:<br>brain death) | NA                    | 8 (8:0)               | 0                         | 8 (7:1)                   |

**Note:**—PVS indicates persistent vegetative state; NA, not applicable; rehab, rehabilitation.

<sup>a</sup> Those with poor neurologic prognosis had supportive care withdrawn.
